# Supplementary material for: In Silico Prediction of Anti-Infective and Cell-Penetrating Peptides from Thalassophryne nattereri Natterin Toxins
Source: MDPI journal article supplement (doi:10.3390/ph15091141), 2022-09-13
Supplement: s1 [file s1]

```

SP|Q66S25|NATT1_THANI MIPSVLLVTLTLLLSWTSAEKDLK----- 23
SP|Q66S21|NATT2_THANI MNLSVLLVTLTLLLSWTSAEKDLK----- 23
SP|Q66S17|NATT3_THANI MKLSVLVVTLLAVSWTSAQPETFSIQ---T-----KEANMNPEPA 37
SP|Q66S13|NATT4_THANI MKLLVLLVTLTLLVLSWTSADVDGQEILQQHNEDNNHKSSELGEAAPQRTDNETSQLGQETP 60
SP|Q66S08|NATTP_THANI MKLLVLLVTLTLLVLSWTSADLDGQEILE--NNEDNNHESELGEPAQHTDDETSQLGQALI 59
*   **:**** :*****:

SP|Q66S25|NATT1_THANI -VRVAR--STNDETNLHWVKCGG--SVPDGA VSIQNTYVSPARTEYVCKSNCEAGYYSTK 78
SP|Q66S21|NATT2_THANI -VRVAR--STNDETNLHWVKCGG--SVPDGA VSIQNTYVSPARTEYVCKCFQAGYYSTK 78
SP|Q66S17|NATT3_THANI NIRVAR--SSSAQSNLQWNYWDGQGA VPDGAVSIWNGEE--KRTDYVCSGCGSSGFYSTK 93
SP|Q66S13|NATT4_THANI TIRVARAYEFSSKSNLEWVRWNG--HIPSNVAVKISNTYV--GREYVVCVRGCEAGYYTPK 116
SP|Q66S08|NATTP_THANI PRCRKMPGVKMC----- 71
      :**** . . :*:.* .* :*..**.* * * :*** *.:*:*: *

SP|Q66S25|NATT1_THANI D-SKCHYPFGRVEQT-TSVC EILVNRDNFELLEWKEGYAGSLPANAVSTCKTNRIYVGKG 136
SP|Q66S21|NATT2_THANI D-SKCHYPYGTKEMATSTNCYILVNRDNFELLEWKDGYAGSVPDNAVSTCKTNKIYVGKG 137
SP|Q66S17|NATT3_THANI TGANCHYAYGETEKT-CSGFSILVNRDNFENLEWKGGSDGSVPKNAVEVCE--KVYVGKN 150
SP|Q66S13|NATT4_THANI KGPSCFYPYGFTEQH-SKMFHILVNRDNFEILEWKWK TGGEVPENAVAKACR--DLYVAKN 173
SP|Q66S08|NATTP_THANI -----
      .*. * : * . ***** * * :.* **..* . :*.*.

SP|Q66S25|NATT1_THANI AYGLGKIEPAHHCLYYGWNGAETWTKTYQALT VNKDVIEQTMKDVKYQTEGVTVIQKGKPE 196
SP|Q66S21|NATT2_THANI AYGLGKIEPANHCLYYVWDGAETWTKTYQALT MNKDVIEQAMKDVKYQTEGVTVIQKGKPE 197
SP|Q66S17|NATT3_THANI KYGLGKVHTKHEALFLPWGHEEHWKDYEVLT VNDVVKQELTQVNYKLDAAHPKIPNPE 210
SP|Q66S13|NATT4_THANI KYGLGKLHQSHHV FYLPWKGT EYKYNEYVVLNVMDVVEQKITNVRYNMKGVEVHKDKPE 233
SP|Q66S08|NATTP_THANI -----
      *****: . . : : *.* * : * .*:.* **:* :*:.*: ... .: **

SP|Q66S25|NATT1_THANI VMRKSTVNNKQCKEVTKT VTLTKDISTEERWDVTNSVTFGVTTT VTAGIPDVASASLAVS 256
SP|Q66S21|NATT2_THANI VMRRSTVNNQHCKEVTKT VTLTKDISTDERWDVTNSVTFGVTTT VTAGIPDVSSASLEIS 257
SP|Q66S17|NATT3_THANI TLRSSASNSQCRPITKT VALEKAIQTEQSWDVTSTVTFGVES SITAGIPDIASATVSVS 270
SP|Q66S13|NATT4_THANI TLRSTSVKNYQCREATKQVTLEKSTETSQSWDVSN SITLVSTEVSA GIPNIADVSAVS 293
SP|Q66S08|NATTP_THANI -----
      .:* :..* :*: ** *:* * .*: :***:..*:** : :*****:..... :*

SP|Q66S25|NATT1_THANI MEARRDFAHGASKTESQSYMVTVSVPVPPKQSC TVSMVAQVKNKADVPFATLIRTYRGGK 316
SP|Q66S21|NATT2_THANI MQATMDFAHGASKTETQSYMVTVSVPVPPKQSC TVSMVAQVKNKADIPFATLIRTYRGGK 317
SP|Q66S17|NATT3_THANI VETSLSVLSGTTTTKTTHTVSVIVTPPNHYCPVMVATKYTADIPFTGKMTRTYRNGQ 330
SP|Q66S13|NATT4_THANI AETSVEISHGTSKTESTSHSLSVSATIPPNSSCSITMEGCTFKANIPFTGRLTRKYSNGK 353
SP|Q66S08|NATTP_THANI -----
      : : .: :*:.*: : : :* . :***: * :* . .*:****. : *.* .*:

SP|Q66S25|NATT1_THANI KTQTTTKGVYRTTQVAETHADVEQCTIIIGDEKDCPKASK----- 355
SP|Q66S21|NATT2_THANI KTQTTTKGVYRTIQVAETHADVEQCTIIIGDAKDCPNASSTITTLRPKLKS KPAKPAKG 376
SP|Q66S17|NATT3_THANI KRTTSITGTYRAIQVGEIRADVQRCSEIAGAKPC----- 364
SP|Q66S13|NATT4_THANI VTSSSVKGIYKKVQVGEIQAVLHRCDKIADAKPC----- 387
SP|Q66S08|NATTP_THANI -----
      : : .* *: **.* :* :*: *.. * *

```

**Figure S1.** Multiple sequence alignment analysis. Natterins from *Thalassophryne nattereri* venom were aligned using ClustalW (UNIT 2.3 Multiple Sequence Alignment Using ClustalW and ClustalX, 2003). Accession numbers: SP|Q66S25| Natterin 1; SP|Q66S21| Natterin 2; SP|Q66S17| Natterin 3; SP|Q66S13| Natterin 4; SP|Q66S08| Natterin P. \*Fully conserved residues; conservation of strongly similar groups (>0.5 in the Gonnet PAM 250 matrix); conservation of weakly similar groups (≤0.5 in the Gonnet PAM 250 matrix) [116].
